1 **Characterization of an ECF56-family sigma factor from *Streptomyces venezuelae***  
2 **reveals a highly conserved regulome**

3 Mitchell G. Thompson\*<sup>1,2,3</sup>, Amin Zargar\*<sup>1,2,4</sup>, Pablo Cruz-Morales<sup>1,2,4</sup>, Tristan De  
4 Rond<sup>1,2,5</sup>, Samantha Chang<sup>1,2</sup>, Allison N. Pearson<sup>1,2</sup>, Garima Goyal<sup>1,2,6</sup>, Jesus F.  
5 Barajas<sup>1,2,6</sup>, Jacquelyn M. Blake-Hedges<sup>1,2,5</sup>, Ryan M. Phelan<sup>1,2</sup>, Victor Reyes-  
6 Umana<sup>1,2,3</sup>, Amanda C. Hernández<sup>1,2</sup>, Nathan J. Hillson<sup>1,2,6</sup>, Patrick M. Shih<sup>1,2,7,8</sup>, Jay D.  
7 Keasling<sup>1-2,9,10,11,12,13</sup>

8 <sup>1</sup>Joint BioEnergy Institute, Emeryville, CA, USA

9 <sup>2</sup>Biological Systems & Engineering Division, Lawrence Berkeley National Laboratory,  
10 Berkeley, CA, USA

11 <sup>3</sup>Department of Plant and Microbial Biology, University of California-Berkeley, Berkeley,  
12 CA, USA

13 <sup>4</sup>QB3 Institute, University of California-Berkeley, 5885 Hollis Street, 4th Floor,  
14 Emeryville, CA 94608, United States

15 <sup>5</sup>Department of Chemistry, University of California-Berkeley, Berkeley, CA, USA

16 <sup>6</sup>Department of Energy Agile BioFoundry, Emeryville, CA, USA

17 <sup>7</sup>Department of Plant Biology, University of California-Davis, Davis, CA, USA

18 <sup>8</sup>Genome Center, University of California-Davis, Davis, CA, USA

19 <sup>9</sup>Environmental Genomics and Systems Biology Division, Lawrence Berkeley National  
20 Laboratory, Berkeley, CA, USA

21 <sup>10</sup>Department of Bioengineering, University of California-Berkeley, Berkeley, CA 94720,  
22 USA

23 <sup>11</sup>Department of Chemical and Biomolecular Engineering, University of California-  
24 Berkeley, Berkeley, CA, USA

25 <sup>12</sup>The Novo Nordisk Foundation Center for Biosustainability, Technical University of  
26 Denmark, Denmark

27 <sup>13</sup>Center for Synthetic Biochemistry, Shenzhen Institutes for Advanced Technologies,  
28 Shenzhen, China

29 \*Authors contributed equally

30 Corresponding author

31 Jay D. Keasling

32 [jdkeasling@lbl.gov](mailto:jdkeasling@lbl.gov)

33

34 **Abstract**

35 Bacteria often possess alternative sigma factors that initiate the transcription of  
36 specific genes under environmental stresses, the largest and most diverse group being  
37 the extracytoplasmic function (ECF) sigma factors. The regulation of ECF activity is  
38 crucial for ensuring the distinct transcription of stress responsive genes only occurs  
39 under the appropriate conditions. While most ECFs are comprised of only the core  $\sigma_2$   
40 and  $\sigma_4$  regions, a unique form of ECF sigma factor regulation also contains a C-terminal  
41 extension bearing homology to the NTF2 superfamily of protein domains. While  
42 previous work has shown that this NTF2 domain can affect transcriptional activity *in vivo*  
43 in ECF41 and ECF42, its role in the newly classified ECF56 subgroup is unknown. In  
44 this work, we show that truncation of the C-terminus of the ECF56 sigma factor  
45 SVEN\_4562 of *Streptomyces venezuelae* upregulates its activity in a hybrid assay.  
46 Through transcriptomics in *S. venezuelae*, we found that this truncated ECF56 sigma  
47 factor has a highly conserved promoter sequence *in vivo*. Bioinformatic assays  
48 illustrated that deep branches of the *Actinobacteria* phylum contained putative ECF56  
49 promoter motifs identical to those found in the *S. venezuelae* ECF56 regulon. We  
50 validated these findings through *ex situ* hybrid assays illustrating that truncated ECF56  
51 sigma factors from phylogenetically diverse *Actinobacteria* activate transcription from  
52 these promoters. Importantly, our work shows that the genetic infrastructure of the

53 ECF56 family of sigma factors is highly conserved and performs important functions yet  
54 to be understood in *Actinobacteria*.

55

## 56 **Importance**

57 Most ECF sigma-factors rely on anti-sigma factor regulation; in contrast, the  
58 unique classes of ECF sigma-factors that contain a C-terminal extension are thought to  
59 respond directly to an environmental signal. Here we show that the *cis*-acting regulatory  
60 element of the ECF56 regulon is likely highly conserved in many *Actinobacteria*, with  
61 exact nucleotide level conservation over ~2 billion years of evolution. The high  
62 conservation of this genetic architecture, as well as a conserved gene content within the  
63 regulon, strongly point to a specialized and important role in *Actinobacteria* biology.

64

## 65 **Introduction**

66 Sigma factors are required for the initiation of transcription in all known bacteria.  
67 They are able to recruit the RNA polymerase (RNAP) core, direct it to a specific  
68 promoter region, and initiate transcription by enabling promoter melting (1). While most  
69 genes in a given bacterium are transcribed using a “housekeeping” sigma factor,  
70 bacteria often possess alternative sigma factors that initiate transcription of specific  
71 subsets of genes in response to specific environmental stresses (1). Families of  
72 alternative sigma factors are involved in responses to stress such as responding to heat  
73 shock (RpoH-like), flagellar synthesis (FliA-like), and nitrogen limitation (RpoN-like) (1).  
74 The largest and most diverse group of alternative sigma factors are the  
75 Extracytoplasmic Function (ECF) sigma factors (1). ECF sigma factors are smaller in  
76 size compared to housekeeping  $\sigma^{70}$  sigma factors, and normally possess only two of the

77 four conserved domains,  $\sigma_2$  and  $\sigma_4$ . These domains are sufficient to recognize the -10  
78 and -35 elements of a bacterial promoter, recruit RNAP core, and initiate transcription  
79 via promoter melting (1). Despite their reduced size, ECF sigma factors play a role of  
80 outsized importance in the transduction of environmental signals in bacteria (2–4).

81 The regulation of ECF activity is critical to ensure that the transcription of stress  
82 responsive genes only occurs under the appropriate conditions. In many cases, ECFs  
83 are negatively regulated by cognate anti-sigma factors, which are usually co-transcribed  
84 as part of a negative feedback loop (5). Anti-sigma factors physically sequester ECFs  
85 until an appropriate environmental signal either leads to the physical destruction of the  
86 anti-sigma factor or alters the affinity of the anti-sigma factor for its cognate ECF (6).  
87 The mechanism that causes dissociation varies widely depending on the ECF sigma  
88 factor, but can take the form of a proteolysis event, export of the anti-sigma factor, or  
89 inactivation of the anti-sigma factor through phosphorylation (5–7).

90 Another form of ECF sigma factor regulation has been described more recently,  
91 via C-terminal extensions of ~100 amino acids that show homology to members of the  
92 NTF2 superfamily of protein domains (8). The NTF2 superfamily of domains is widely  
93 distributed on the tree of life and shows little conservation at the primary sequence  
94 identity level; but members include many enzymes and a recent review of their function  
95 has implicated allosteric regulation of DNA binding proteins (8). Studies of these NTF2  
96 domains in ECF41 and ECF42 found it was critical to initiation of gene transcription and  
97 strongly implicate that it directly responds to an external signal (9–12). In 2015, a  
98 genomic survey of ECFs and other signal transduction proteins in *Actinobacteria*  
99 revealed another group of ECFs with similar C-terminal extensions: the ECF56

100 subgroup (13). Previous work with the *Mycobacterium tuberculosis* ECF56 family sigma  
101 factor Rv0182c (*sigG*) implicated involvement in DNA damage response pathways (14,  
102 15). While genes regulated by SigG were identified, neither the physiological role these  
103 genes play nor the environmental cue SigG responds to were identified. To date, the  
104 specific signal that is transduced by the NTF2 domain of ECF56 or any other ECF  
105 family members has yet to be identified.

106 In an attempt to shed light on the physiological role of the ECF56 subfamily, we  
107 characterized the regulatory activity of the NTF2 domain of ECF56 sigma factors *ex situ*  
108 in *Escherichia coli* and *in vivo* in *S. venezuelae*. Beyond its attributes as a fast-growing,  
109 genetically tractable *Actinobacteria*, *S. venezuelae* has also been previously used to  
110 study the NTF2 domain of the ECF42 sigma factor subfamily (10). In this work, we  
111 identify a highly conserved promoter that defines an ECF56 regulon in *S. venezuelae*  
112 and demonstrate through bioinformatics that the regulon is highly conserved through  
113 deep branches of *Actinobacteria*. Lastly, we further validate our findings regarding the  
114 role of these C-terminal extensions by determining their role in diverse ECF56 sigma  
115 factors.

116

## 117 **Results**

### 118 The C-terminal extension of ECF56 sigma factors inhibits transcription

119 We first aimed to determine the regulatory role of these C-terminal extensions in  
120 ECF56 sigma factors. To start, we sought to determine the differential transcriptional  
121 activity with and without the C-terminal extension of the ECF56 sigma factor from *S.*  
122 *venezuelae*, SVEN\_4562 (**Figure 1A**). Previously, Wecke and colleagues had identified

123 a conserved DGGGK motif downstream of the  $\sigma_4$  domain in ECF41 family sigma factors  
124 (**Figure S1A**). Truncating the C-terminus of these sigma factors immediately after this  
125 motif resulted in increased transcription from cognate promoters (12). By aligning >900  
126 ECF56 sigma factors, we observed a highly conserved MPP(F/Y/L) motif similarly  
127 positioned relative to the  $\sigma_4$  domain (**Figure S1B**). As ~60% of ECF56 sigma factor  
128 sequences contained an aromatic phenylalanine or tyrosine after the highly conserved  
129 MPP, we truncated SVEN\_4562 immediately after its internal MPPY to maintain the  
130 aromatic residue, resulting in SVEN\_4562 $_{\Delta 237-323}$ .

131 To test this hypothesis we measured transcription from a previously identified  
132 *Rv0182c* target promoter (*Rv0887cp*) from *M. tuberculosis* in an *ex situ* assay (15). In *E.*  
133 *coli*, the transcription of each sigma factor was driven by a leaky uninduced lacUV5  
134 promoter, and its ability to bind and drive expression of the *Rv0887c* promoter was  
135 determined through a GFP reporter protein (**Figure 1B**). Compared to the empty vector  
136 control, we observed a 2.4-fold increase in GFP expression in the strain overexpressing  
137 the truncated ECF56 sigma factor. In contrast, overexpression of the full ECF56 sigma  
138 factor resulted in a 1.1-fold increase in GFP expression. These observations suggest  
139 that the C-terminal extension of ECF56 sigma factors inhibits promoter binding.  
140 Interestingly, this contrasts with other investigations of this domain in *Actinobacteria*,  
141 which found that the full C-terminal extension was required for complete activation of  
142 transcription (10–12).

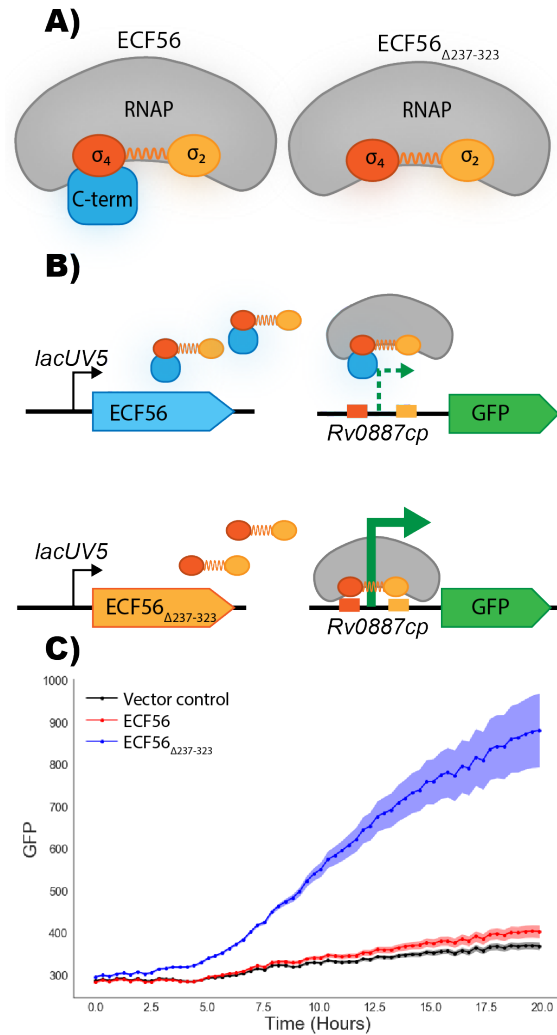

143

144 **Figure 1. Architecture, and characterization of ECF56 sigma factors.** A) Schematic illustrates the  
145 interactions between RNA polymerase and ECF sigma factors with and without the NTF2 domain. B) The  
146 schematic illustrates the genetic circuit built in *E. coli*. Wild-type ECF56 sigma factor(SVEN\_4562) or a  
147 truncated variant is constitutively expressed and results in the transcription of a GFP cassette driven by  
148 the known ECF56-dependent promoter. C) Graph shows GFP fluorescence in arbitrary units over time in  
149 strains expressing variants of SVEN\_4562 or an empty vector control. Shaded area shows 95%  
150 confidence intervals, n=3.

151

152 Defining the ECF56 Regulon of *S. venezuelae*

153 As the ECF56 family is widely distributed in *Actinobacteria* (13), we hypothesized  
154 that they must play an important physiological role in these organisms, such as *S.*  
155 *venezuelae*. Therefore, we cloned the truncated SVEN\_4562 under the strong  
156 constitutive promoter kasOp and genetically inserted it into the *S. venezuelae* genome  
157 at the *phiC* attachment site. Constitutive expression of truncated SVEN\_4562 produced  
158 a bald phenotype (**Figure 2A**). This is especially interesting because C-terminal  
159 truncations of ECF42 in *S. venezuelae* showed no observable differences in  
160 morphology (10).

161 Through transcriptomics, we sought to develop a greater understanding of the  
162 physiological role of ECF56 in *S. venezuelae*. Using RNA sequencing (RNA-seq), we  
163 compared the transcriptomes of a strain overexpressing the truncated ECF56 to the  
164 wild-type strain and observed a population of genes that were heavily upregulated  
165 (**Figure 2B**). The complete list of differentially expressed genes can be found as  
166 **Supplemental Attachment 1**. Our results showed that 22 loci had a *b* of >3.5 and a *q*-  
167 *value* less than  $1 \times 10^{-10}$ , representing the most highly upregulated genes. However,  
168 previous work in studies where transcription factors were overexpressed had noticed  
169 significant read through between genes that could potentially confound results (16). To  
170 account for this possibility we manually investigated reads mapped to the *S. venezuelae*  
171 chromosome to identify instances in which increased differential expression was likely  
172 due to read through (or direct overexpression in the case of SVEN\_4562) and identified  
173 12 genes likely to be false hits (**Table S1**). The resulting genes that were specifically  
174 upregulated by the truncated ECF56 sigma factor were amongst the most highly  
175 expressed in the cell, with transcript per million (TPM) values either close to or as high



176 as genes such as *rpoD* and *EF-Tu* (**Figure 2C**). Unfortunately, none of the genes found  
 177 to be upregulated and controlled by SVEN\_4562 directly had a known function. Of the  
 178 ten genes, six were annotated as proteins of hypothetical function, whereas the  
 179 remaining genes were annotated in broadly functional families such as glyoxalase,  
 180 hydrolase, dihydrofolate reductase, and deaminase-reductase (**Table 1**). Interrogation  
 181 of the upstream sequences of the genes in **Table 1** revealed a nearly perfectly  
 182 conserved promoter motif (CGATGAGTTN<sub>14</sub>GGTC - **Figure 2D**). Even more striking  
 183 was that this promoter motif was also perfectly conserved in the distantly related *M.*  
 184 *tuberculosis* ECF56 sigma factor regulated *Rv0887c* (**Figure 2D**).

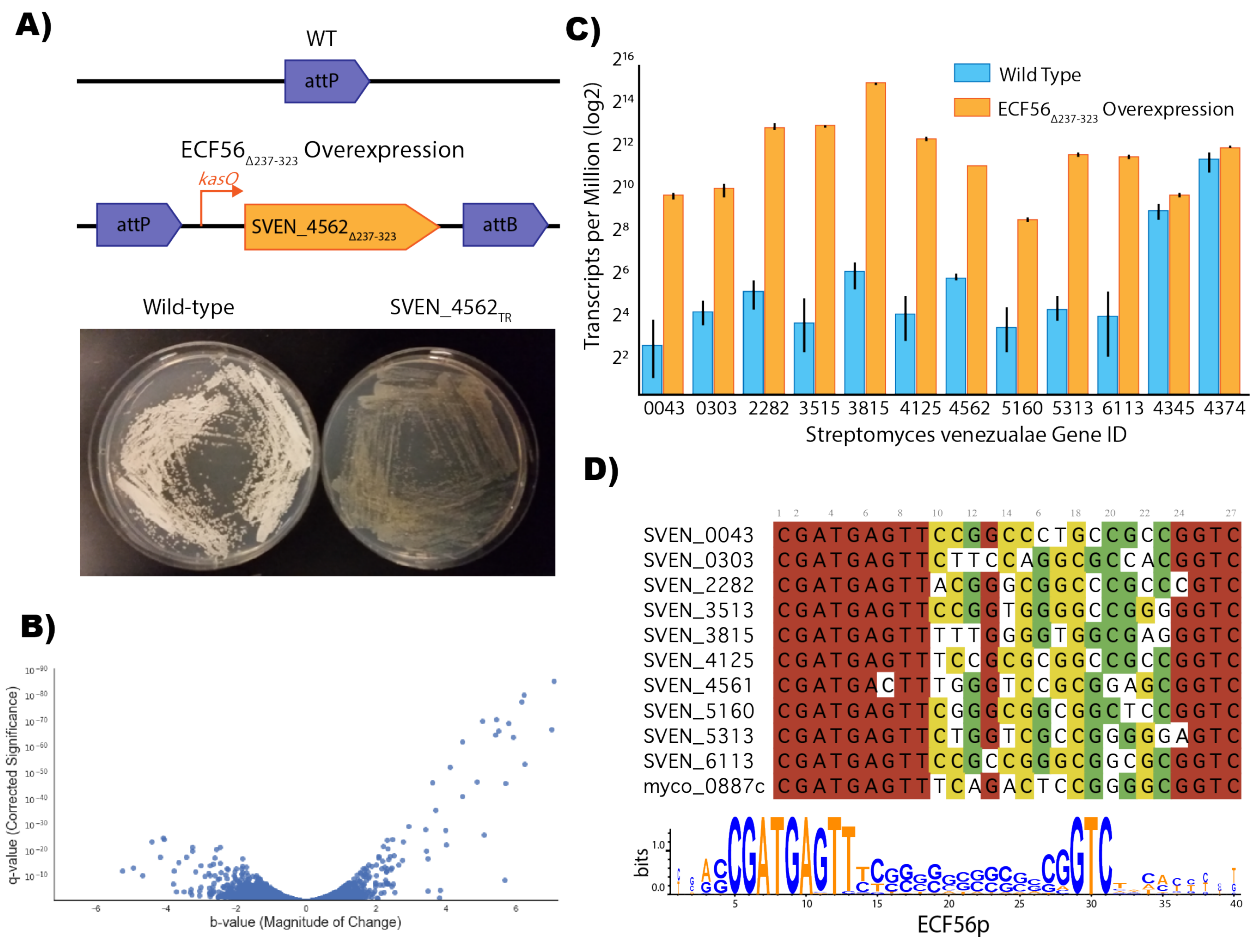

185

186 **Figure 2. Identification of genes regulated by SVEN\_4562.** A) A truncated version of ECF56 from *S.*

187 *venezuelae* (SVEN\_4562) driven by the kasOp promoter was inserted into the genome of *S. venezuelae*

188 resulting in a bald phenotype when compared to the wild-type control. **B)** Volcano plot showing RNA-Seq  
189 analysis of transcripts of the truncated SVEN\_4562 overexpressing strain compared to wild-type *S.*  
190 *venezuelae*. The y-axis shows the q-value (corrected significance), while the x-axis shows b-value  
191 (magnitude of change). Results represent n=3 **C)** Genes believed to be directly upregulated when  
192 truncated SVEN\_4562 is overexpressed, in addition to *rpoD* (SVEN\_4345) and *EF-Tu* (SVEN\_4374).  
193 Error bars show 95% confidence interval, n=3. **D)** Top panel illustrates an alignment of the upstream  
194 sequences of these upregulated genes and the bottom panel represents a position weight matrix of these  
195 sequences.  
196

| <b>Gene ID</b> | <b>Description</b>                              | <b><i>b</i></b> | <b><i>q-value</i></b> |
|----------------|-------------------------------------------------|-----------------|-----------------------|
| SVEN_3513      | putative hydrolase                              | 7.08            | 3.89E-86              |
| SVEN_3815      | hypothetical protein                            | 6.52            | 2.47E-93              |
| SVEN_4125      | hypothetical protein                            | 6.24            | 8.38E-81              |
| SVEN_6113      | Dihydrofolate reductase                         | 5.92            | 2.27E-64              |
| SVEN_2282      | Glyoxalase family protein                       | 5.79            | 8.97E-70              |
| SVEN_0043      | hypothetical protein                            | 5.71            | 2.58E-46              |
| SVEN_5313      | Bifunctional deaminase-reductase domain protein | 5.50            | 1.41E-66              |
| SVEN_0303      | hypothetical protein                            | 4.47            | 1.98E-41              |
| SVEN_5160      | hypothetical protein                            | 4.13            | 1.33E-52              |
| SVEN_4561      | hypothetical protein                            | 3.70            | 4.14E-36              |

198 **Table 1: Genes predicted to be regulated by SVEN\_4562.** Genes that were found to be highly  
199 upregulated during the overexpression of truncated SVEN\_4562, and not to be the result of suspected  
200 readthrough. The b-value is a measure of change in expression (17), where as the qval is a corrected  
201 significance value.

202

### 203 Predicting the ECF56 Regulome

204         Given the highly conserved nature of the *S. venezuelae*, and *M. tuberculosis*  
205 promoters we sought to investigate the genomic context of ECF56 homologs in selected  
206 Actinobacterial genomes. We searched for homologs of ECF56 in a database including  
207 720 high quality genomes from actinobacterial species. We retrieved 599 homologs  
208 from 414 genomes, mostly from Streptomycetaceae, Mycobacteria and  
209 Pseudonocardiaceae. We found that most *Streptomyces spp.* (75%) included a single  
210 ECF56 homolog. A phylogenetic reconstruction (**Supplemental Attachment 2**)  
211 showed that these single copy-ECF56 homologs are monophyletic, we also found that  
212 these homologs share a high degree of synteny among streptomycetes.

213         After confirming the broad distribution and conservation of the ECF56 we then  
214 sought to identify putative members of regulons in distinct species. For this analysis we  
215 selected ten representative genomes and searched for the ECF56 consensus binding  
216 sequence “CGATGAGTTN<sub>15</sub>GTC”. This search revealed that many proteins belonging  
217 to the glyoxylase, dehydrofolate reductase and alpha/beta hydrolase families among  
218 others are under the control of ECF56 across largely divergent actinobacterial species.  
219 Two interesting exceptions were found: only one protein (a member of the glyoxylase  
220 family) is located upstream of the ECF56 binding sequence in *M tuberculosis* while

221 none could be found in *Salinispora tropica* which nevertheless includes a bonafide  
 222 ECF56 homolog.

223

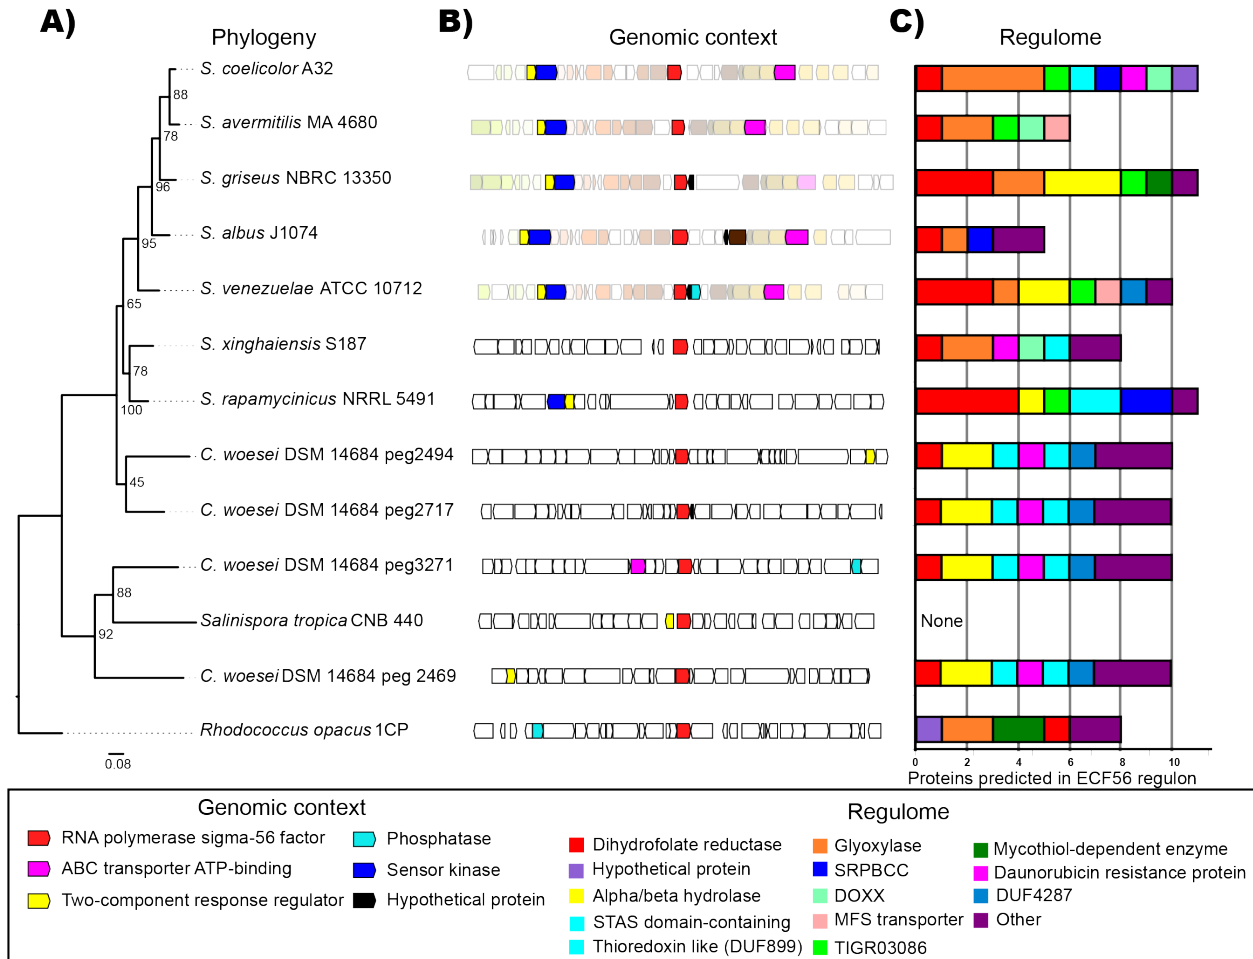

224

225 **Figure 3. Distribution of ECF56 across Actinobacteria.** **A**, Phylogenetic distribution of representative  
 226 orthologs from selected Actinobacteria species, Most *Streptomyces* genomes include only one copy,  
 227 while *C. woesei* includes four. **B**. Genomic neighborhood for each ECF56 ortholog in red. The genes are  
 228 colored according to their homology. Faded colors represent the genome neighborhood conserved in  
 229 recently diverged orthologs. Solid colors represent conserved genes within the genomic neighborhood,  
 230 their annotation is shown at the bottom. **C**. Abundance and functions of the genes regulated by ECF56  
 231 in each species. Each bar accounts for the number of the proteins predicted (and confirmed in the case of

232 *S. venezuelae*), to be regulated by ECF56. The functions are represented by different colors shown in  
233 the box at the bottom.

234

### 235 Conservation of target promoter of ECF56 across phyla

236 Lastly, we wanted to investigate the potential upregulation of transcription of the  
237 truncated ECF56 in various species, as similar studies in ECF41 have shown varying  
238 results depending on the coding sequence. As such, we cloned truncated versions of  
239 two more ECF56 from *C. woesei* and *M. tuberculosis* (**Figure 4A**). *C. woesei* was  
240 selected due to its divergence from Streptomyces ~2 billion years ago (18), yet  
241 bioinformatic analysis revealed the identical promoter sequences were conserved in its  
242 genome. *M. tuberculosis* was selected due to its importance as a public health threat,  
243 and previous work that has been done on the Rv0182c regulon (14, 15). As with  
244 SVEN\_4562, both of these homologs were truncated immediately past a conserved  
245 MPPF motif in the case of Cwoe\_2709, and an MPPY motif for Rv0182c. We also  
246 cloned an additional ECF dependent promoter, SVEN\_3513p, to compare the  
247 differences due to the regions varying between the -35 and -10 elements. All ECF56  
248 truncations performed similarly in the *ex situ* assay, while the promoter of *M.*  
249 *tuberculosis* showed greater upregulation than the promoter of SVEN\_3513, suggesting  
250 that the intergenic -35 and -10 region does affect transcription.

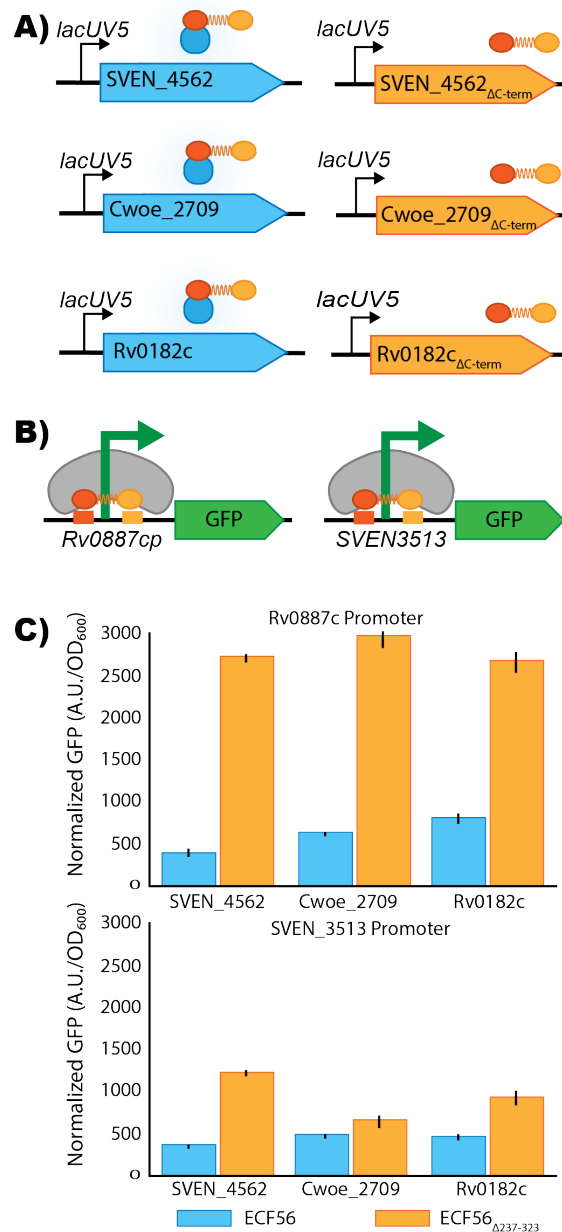

251

252 **Figure 4. Genetic architecture of ECF56 across phyla. A)** A wild-type and truncated version of three

253 phylogenetically distinct ECF56 promoters are driven by the *lacUV5* promoter were constructed **B)**

254 Promoters from *M. tuberculosis* (RV0887c) and *S. venezuelae* (SVEN\_3513) transcribe the GFP reporter

255 in the presence of the ECF sigma factor **C)** *ex situ* assay illustrating the overnight GFP expression levels

256 in *E. coli* normalized to cell density. Error bars represent 95% confidence intervals, n=3.

257

## 258 Discussion

259 Traditionally, sigma factors have been thought to rely on one or more trans-  
260 acting partners to transduce specific environmental cues in order to activate responsive  
261 gene expression (5). Recent work has challenged this notion, with the discovery that  
262 many C-terminal extensions modulate the activity of a variety of ECF sigma factor  
263 families (19). These domains presumably are able to sense environmental signals,  
264 which results in conformational changes that activate expression of their cognate  
265 regulon, effectively turning them into one-component systems (19). However despite  
266 recent efforts, which have defined multiple putative regulons of these ECF sub-families,  
267 the physiological roles that these ECFs regulate and the signals that they respond to  
268 remain a mystery (19).

269 With its unique role in ECF transcription, efforts have been made to study the  
270 NTF2 domain and its interaction with the target promoter and RNA polymerase. Initial  
271 studies in the ECF41 subfamily in *B. lincheniformis* (Firmicutes) and *R. sphaeroides* ( $\alpha$ -  
272 proteobacteria) found that truncations of the NTF2 domain drastically upregulated  
273 transcription of a highly conserved promoter (12). Interestingly, biochemical and crystal  
274 structure studies of the ECF41  $\sigma^J$  of *M. tuberculosis* (*Actinobacteria*) and the ECF42 of  
275 *S. venezuelae* (*Actinobacteria*) revealed that the NTF2 domain was necessary for  
276 transcription (9, 10). While a direct coupling analysis of ECF41 and ECF42 revealed  
277 that the NTF2 region bind and regulate the core ECF regions of  $\sigma_2$  and  $\sigma_4$  responsible  
278 for transcription (11), the role of these NTF2 domains in the ECF56 subfamily has not  
279 yet been studied. Crystallographic studies of ECF56 homologs may provide crucial  
280 information on how NTF2 domains impose negative regulation.

281           The only previously studied member of the ECF56 subfamily is Rv0182c (SigG)  
282 of *M. tuberculosis*. SigG was shown to be the most weakly expressed sigma factor in *M.*  
283 *tuberculosis* when grown in laboratory conditions, potentially making it challenging to  
284 study (20). However microarray analysis revealed *sigG* to be one of the most  
285 upregulated genes when *M. tuberculosis* was grown during human macrophage  
286 infection prompting further research (21). Further work then showed that SigG was  
287 upregulated in the presence of the DNA damaging agent mitomycin C, and that it  
288 controlled the expression of two proteins that contained glyoxalase domains (14, 15).  
289 This connection to the DNA-damage response was recently confirmed when it was  
290 found that SigG is regulated by the PafBC system (22). PafBC has recently been shown  
291 to be the master transcriptional regulator of the LexA/RecA-independent DNA repair  
292 response in *M. tuberculosis* (22). One of the main functions of this response is to  
293 proteolytically degrade RecA, to temporally control the stress response (22). This may  
294 suggest that the C-terminus of ECF56 sigma factors respond to specific DNA damage  
295 signals to activate a highly conserved stress response (**Figure 5**). Our transcriptomic  
296 investigation in *S. venezuelae* revealed putative glyoxalase proteins strongly  
297 upregulated with constitutive expression of the truncated ECF56 sigma factor. As our  
298 bioinformatic studies revealed many other *Actinobacteria* also had glyoxalases,  
299 dihydrofolate reductases, and  $\alpha/\beta$  hydrolases in their predicted ECF56 regulons, it is  
300 conceivable that these enzymes are required to metabolize toxic byproducts of DNA  
301 damage. However, these protein families are known to have a wide range of functions,  
302 and further experimentation is clearly required to predict their exact function. We believe



303 that future work should focus heavily on the physiological and biochemical roles these  
304 proteins play, which will further elucidate the signals that activate ECF56 sigma factors.

305 Rhodius et al. had previously proposed that ECF sigma factors may make  
306 excellent parts for synthetic biology by demonstrating their exceptional orthogonality  
307 (23). They further went on to show that domains from different ECF subfamilies can be  
308 combined to generate functional proteins that recognize hybrid promoters (23). From  
309 this work various groups have used ECF sigma factors to build highly insulated genetic  
310 circuits (24), ECF sigma factor based toolkits for both *E. coli* and *Bacillus subtilis* (25,  
311 26), and highly complex synthetic timers (27). All of these synthetic circuits take  
312 advantage of the highly specific interaction ECF sigma factors have with their cognate  
313 promoters. Based on the extreme conservation of the ECF56 promoter, the ECF56  
314 subfamily is also likely to be highly orthogonal to other ECF promoters. While this  
315 orthogonality is highly desirable in genetic engineering, the activity of most ECF sigma  
316 factors relies on control by either cognate anti-sigma factors or synthetic genetic  
317 circuitry. This excess genetic baggage may complicate some engineering tasks. The  
318 prospect that C-terminal extended ECF sigma factor may be able to transduce a variety  
319 of environmental cues is extremely intriguing. If the signal could be identified, these  
320 proteins could function as highly orthogonal, tunable, stand alone genetic parts. Further  
321 work on these unique transcription factors should heavily focus on deorphaning these  
322 receptors.

323

324

325

326

327

328

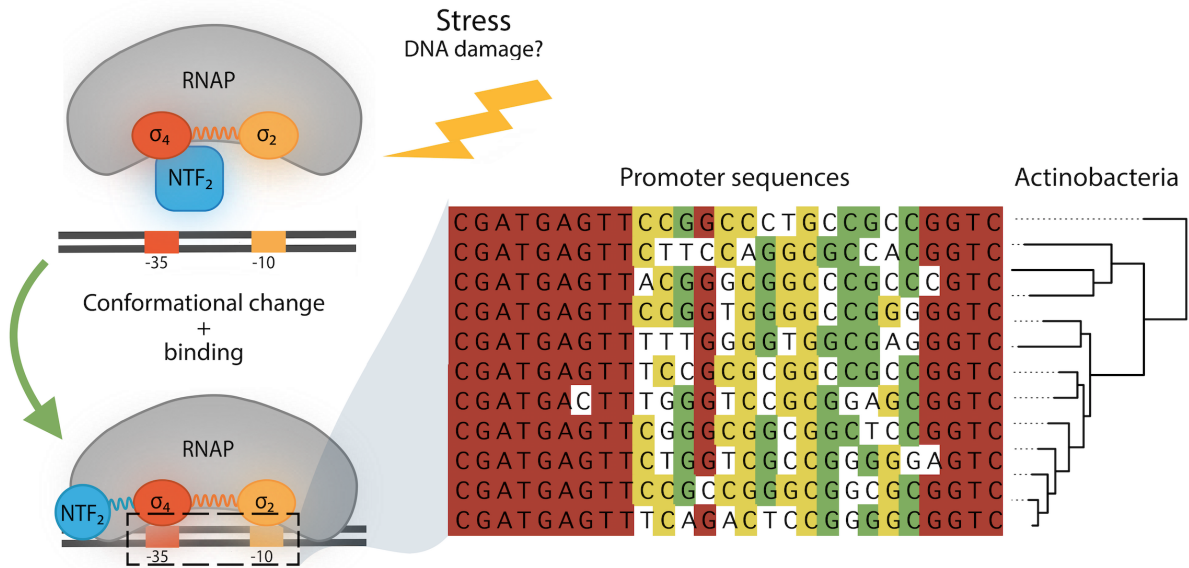

329

330

331 **Figure 5:** Investigations into sigma factor ECF56 in *S. venezuelae* uncovers that the removal of the  
332 inhibitory NTF2 domain results in constitutive transcription of a highly conserved promoter across vast  
333 phylogenetic distances.

334

## 335 **Methods**

### 336 Media, Chemicals, and Strains

337 *E. coli* bacterial cultures were grown in Luria-Bertani (LB) Miller medium (BD  
338 Biosciences, USA) at 37 °C. *S. venezuelae* ATCC 10712 was grown on MYM media  
339 (28), and sporulated on mannitol soy (MS) agar media supplemented with 10 mM  
340 magnesium chloride (28) . Cultures were supplemented with carbenicillin (100 mg/L,  
341 Sigma Aldrich, USA), kanamycin (50 mg/L, Sigma Aldrich, USA), or spectinomycin (100  
342 mg/L for *E. coli* or 400 mg/L for *S. venezuelae*, Sigma Aldrich, USA) All bacterial strains

343 and plasmids used in this work are listed in **Table 2** and are available through the public  
344 instance of the JBEI registry. (<https://public-registry.jbei.org/>).

345

346 **Table 2: Strains and Plasmids used in this study**

| <b>Strains</b>            | <b>JBEI<br/>Number</b> | <b>Source</b> | <b>Notes</b>  |
|---------------------------|------------------------|---------------|---------------|
| <i>E. coli</i> DH10B      |                        | Thermo Fisher |               |
| <i>E. coli</i> ET12567    |                        | ATCC BAA-525  |               |
| <i>S. venezuelae</i>      |                        | ATCC 10712    |               |
| <b>Plasmids</b>           |                        |               |               |
| pUZ8002                   |                        | (29)          |               |
| pSC-KasOp-mCherry         |                        | (30)          | Spectinomycin |
| pSC-KasOp-SVEN_4562_trunc | TBD                    | This work     | Spectinomycin |
| pBbE5k-RFP                |                        | (31)          | Kan           |
| pBbB5a-RFP                |                        | (31)          | Amp           |
| pBbE5k-SVEN_4562          | TBD                    | This work     | Kan           |
| pBbE5k-SVEN_4562_trunc    | TBD                    | This work     | Kan           |
| pBbE5k-Cwoe_2709          | TBD                    | This work     | Kan           |

|                        |     |           |     |
|------------------------|-----|-----------|-----|
| pBbE5k-Cwoe_2709_trunc | TBD | This work | Kan |
| pBbE5k-Rv0182c         | TBD | This work | Kan |
| pBbE5k-Rv0182c_trunc   | TBD | This work | Kan |
| pBbBa Rv0877cp::GFP    | TBD | This work | Amp |
| pBbBa SVEN_3513p::GFP  | TBD | This work | Amp |

347

#### 348 DNA Manipulation

349 All plasmids were designed using Device Editor and Vector Editor software, while  
350 all primers used for the construction of plasmids were designed using j5 software (32–  
351 34). Plasmids were assembled via Gibson Assembly using standard protocols (35), or  
352 Golden Gate Assembly using standard protocols(36). Plasmids were routinely isolated  
353 using the Qiaprep Spin Miniprep kit (Qiagen, USA), and all primers were purchased  
354 from Integrated DNA Technologies (IDT, Coralville, IA). *E. coli* codon optimized gene  
355 blocks for *Rv0182c* and *Cwoe\_2709* were purchased from Integrated DNA  
356 Technologies (IDT, Coralville, IA).

357

#### 358 Conjugation into *Streptomyces venezuelae*

359 *E. coli* ET12567/pUZ8002 was transformed with an appropriate vector and  
360 selected for on LB agar containing kanamycin (25 µg/mL), chloramphenicol (15 µg/mL),  
361 and apramycin (50 µg/mL). A single colony was used to inoculate 5 mL of LB containing  
362 kanamycin (25 µg/mL), chloramphenicol (15 µg/mL), and apramycin (50 µg/mL) at  
363 37°C. The overnight culture was used to seed 10 mL of LB containing the same  
364 antibiotics, which was grown at 37°C to an OD600 of 0.4-0.6. The *E. coli* cells were

365 pelleted by centrifugation, washed twice with LB, and resuspended in 500  $\mu$ L of LB.  
366 Fresh *S. venezuelae* J1074 spores were collected from a mannitol soy agar plate with 5  
367 mL of 2xYT and incubated at 50°C for 10 min. The spores (500  $\mu$ L) and the *E. coli* cells  
368 (500  $\mu$ L) were mixed, spread onto mannitol soy agar, and incubated at 30°C for 16  
369 hours. After 1 mL addition of nalidixic acid (20  $\mu$ g/mL) and apramycin (40  $\mu$ g/mL) was  
370 added and allowed to dry, the plate was further incubated for 3-4 days at 30°C. A single  
371 colony was used to inoculate into TSB containing nalidixic acid (25  $\mu$ g/mL) and  
372 apramycin (25  $\mu$ g/mL). The overnight culture was spread onto a MS plate and incubated  
373 at 30°C for 2-3 days. The spores were collected from the plate with 3-4 mL of water and  
374 mixed with glycerol to prepare 25% glycerol stock. The glycerol stock was stored at -  
375 80°C for long-term storage.

#### 376 RNA Isolation and RNA-Seq

377 RNA was isolated from mycelial cultures grown for 24 hours on MYM media at  
378 30 °C. Briefly, 1 mL of culture was mixed with 2 volumes of RNAlater (Invitrogen, USA)  
379 for five minutes at room temperature, pelleted in a Eppendorf 5245 centrifuge for 2  
380 minutes at 10,000 rpm and decanted. Pelleted mycelia were then stored at -80 °C until  
381 RNA was extracted. RNA was isolated using QIAGEN RNeasy kit (Qiagen, USA) per  
382 manufacturer's instructions for gram-positive bacteria. Genomic DNA was removed with  
383 Ambion Turbo DNase (Invitrogen, USA). Bacterial rRNA was removed from total RNA  
384 using a Ribo-Zero RNA removal kit (Illumina, USA), and libraries for RNAseq were  
385 prepared using the NEBNext Ultra II RNA Library Prep Kit for Illumina (New England  
386 Biolabs, USA) according to the manufacturer's instructions. Libraries were then  
387 sequenced on a Illumina MiSeq using kit v3 (2 x 75-cycle) with paired-end reads.

388 RNAseq data was analyzed with Kallisto (37) which pseudo-aligned reads to the *S.*  
389 *venezuelae* ATCC 10712 coding sequences (GCA\_008639165.1). Sleuth was then  
390 used to calculate differential expression (17). Raw transcript per million (TPM) values,  
391 genome wide differential expression, and the top 100 most upregulated genes during  
392 SVEN\_4562 \_trunc overexpression can be found in **Supplemental Attachment 1**. In  
393 order to identify potential promoter readthrough, raw reads were mapped to the *S.*  
394 *venezuelae* ATCC 10712 genome using Bowtie 2 (38), and mapped reads were  
395 visualized with the Integrated Genomics Viewer (39). Genes that showed upregulation  
396 as a consequence from readthrough were not considered for further promoter analysis.  
397

#### 398 Fluorescence Assays

399 Fluorescence assays were conducted as previously described with minor  
400 changes (40). All endpoint assays were conducted in 96-deep well plates (Corning  
401 Costar, 3960), with each well containing 500  $\mu$ L of LB medium with appropriate  
402 antibiotics inoculated at 1% v/v from overnight cultures. Plates were sealed with  
403 AeraSeal film (Excel Scientific, AC1201-02 and incubated at 37 C in a 250 rpm shaker  
404 rack. After 24 hours, 100  $\mu$ L from each well was aliquoted into a black, clear-bottom 96-  
405 well plate for measurements of optical density and fluorescence using an Infinite  
406 F200Pro (Tecan Life Sciences, San Jose, CA) plate reader. Optical density was  
407 measured at 600 nm ( $OD_{600}$ ), while fluorescence was measured using an excitation  
408 wavelength of 470 nm, an emission wavelength of 530 nm, and a manually set gain of  
409 25. To perform time course assays, overnight cultures were inoculated into 10 mL of LB  
410 medium from single colonies, and were grown at 37 °C. These cultures were then

411 diluted 1:100 into 100  $\mu$ L of LB medium in 96-well plates (Falcon, 353072). Plates were  
412 sealed with a gas-permeable microplate adhesive film (VWR, USA), and then optical  
413 density and fluorescence were monitored for 20 hours in a Tecan Infinite F200Pro  
414 (Tecan Life Sciences, San Jose, CA) plate reader. Optical density was measured at 600  
415 nm ( $OD_{600}$ ), while fluorescence was measured using an excitation wavelength of 470  
416 nm, an emission wavelength of 530 nm, and a manually set gain of 25.

417

#### 418 Bioinformatics

419 Sequences of ECF sigma factors were downloaded from Pfam -  
420 <https://pfam.xfam.org/family/Sigma70> ECF. An ECF56 sigma factor HMM was  
421 generated as described previously (4), and ECF56 family sigma factors were identified  
422 using hmmscan (41). ECF56 alignments were done using the MAFFT-LINSI algorithm  
423 (42) and visually inspected using UGENE software (43). Alignments were restricted to  
424 positions that had greater than 50% occupancy using Protein Dynamics and Sequence  
425 Analysis (ProDy) (44, 45). All conserved sequence motifs were visualized with Weblogo  
426 (46).

427 We mined for ECF56 homologs in actinobacteria using the amino acid sequence  
428 of SVEN\_4562 as query for searches using BlastP with an E-value cutoff of  $1E-12$  and a  
429 bit-score cutoff of 200. Independent BlastP searches were done with each one of 720  
430 high quality genomes. The retrieved protein sequences were aligned using muscle  
431 (47), and trimmed using jalview (48). An ECF56 phylogenetic tree was obtained using  
432 IQtree with the resulting amino acid matrix the best amino acid substitution model for  
433 the tree was selected using the ModelFinder utility implemented in IQtree (49). Node

434 support comes from 10000 bootstrap generations. For analysis of the genome context  
435 of the selected ECF56 homologs shown in figure 3 we used CORASON with an adhoc  
436 genomes database including selected organisms (50). the parameters for the search  
437 were e-value 1E-12 and bit-score cutoff of 200, the graphical output was modified to  
438 follow the order of a phylogenetic tree generated with the protein sequences homologs  
439 identified by CORASON with identical parameters to those described above.

440 The regulon of each organism shown in figure 3 was obtained by searching for  
441 the ECF56 binding consensus sequence “CGATGAGTTnnnnnnnnnnnnnnnnGTC” in  
442 each representative genome using the Artemis genome browser. Genes were  
443 considered ECF56 regulon members if located immediately downstream of the ECF56  
444 binding sequence. Members of the regulon were manually annotated by performing  
445 blast searches against the NR database and searching for annotated domains in the  
446 hmmscan server (51).

447

## 448 **Acknowledgements**

449 The authors would like to thank Matthew Traxler for helpful discussions during  
450 the preparation of this manuscript. This work was part of the DOE Joint BioEnergy  
451 Institute (<https://www.jbei.org>) supported by the U.S. Department of Energy, Office of  
452 Science, Office of Biological and Environmental Research, and was part of the Agile  
453 BioFoundry (<http://agilebiofoundry.org>) supported by the U.S. Department of Energy,  
454 Energy Efficiency and Renewable Energy, Bioenergy Technologies Office, through  
455 contract DE-AC02-05CH11231 between Lawrence Berkeley National Laboratory and  
456 the U.S. Department of Energy. This work was also funded by National Institutes of



457 Health Awards, F32GM125179. The views and opinions of the authors expressed  
458 herein do not necessarily state or reflect those of the United States Government or any  
459 agency thereof. Neither the United States Government nor any agency thereof, nor any  
460 of their employees, makes any warranty, expressed or implied, or assumes any legal  
461 liability or responsibility for the accuracy, completeness, or usefulness of any  
462 information, apparatus, product, or process disclosed, or represents that its use would  
463 not infringe privately owned rights.

#### 464 **Contributions**

465 Conceptualization, M.G.T., A.Z.; Methodology, M.G.T., A.Z., P.C.M.,  
466 T.D.R.; Investigation, M.G.T., A.Z., P.C.M., T.D.R., S.C., R.M.P., G.G., A.N.P., J.F.B.,  
467 J.M.B., V.R.; Writing – Original Draft, M.G.T, A.Z., P.C.M.; Writing – Review and Editing,  
468 All authors.; Resources and supervision N.J.H., P.M.S., J.D.K.

469

#### 470 **Supplementary Material**

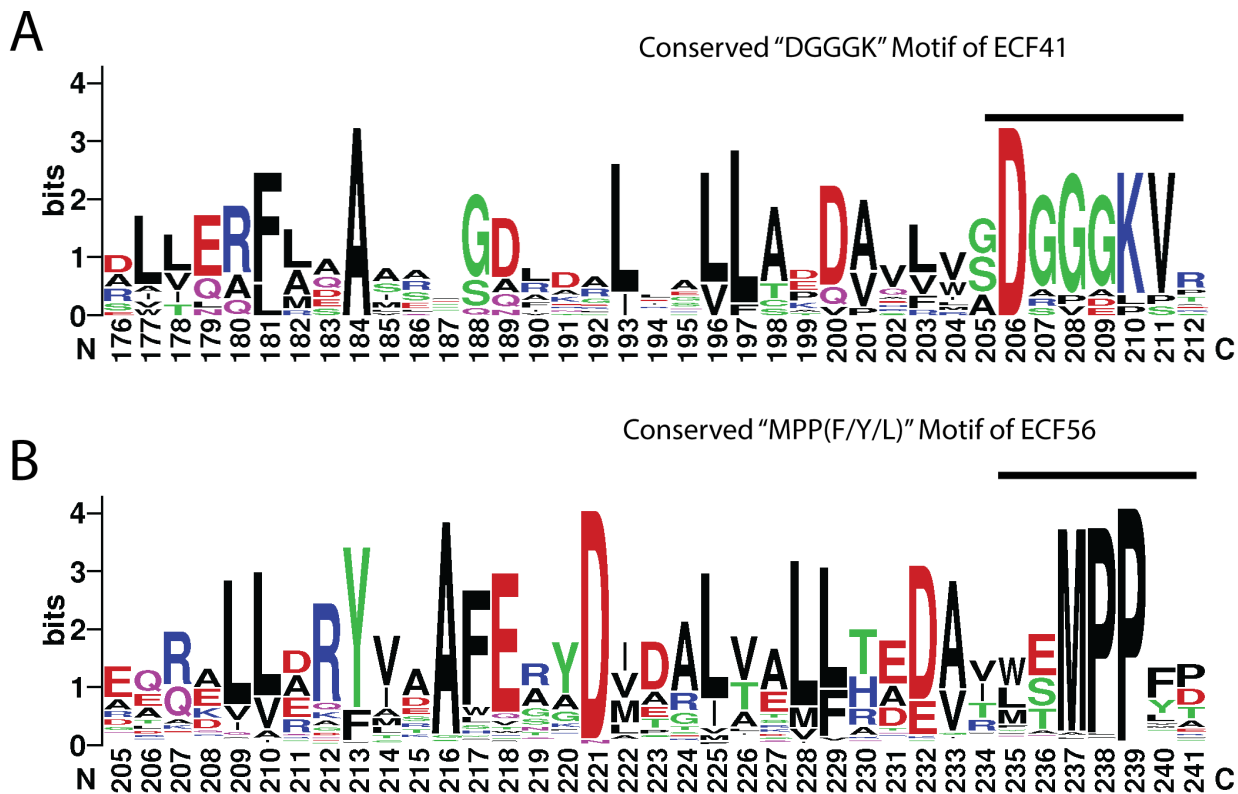

471

472 **Figure S1. Conserved motifs of ECF41 and ECF56 that delineate truncation sites.** Conserved  
 473 residues of the beginning of the NTF2 domain of both ECF41 (A), and ECF56 (B) sigma factors. The  
 474 conserved motifs DGGGK of ECF41 and MPP(F/Y/L) of ECF56 are highlighted.

475 **Table S1: Suspected read through or overexpression artifacts from RNA-Seq analysis.** Genes that  
 476 were found to be highly upregulated as a consequence of read through during the overexpression of  
 477 truncated SVEN\_4562. The b-value is a measure of change in expression (17), where as the qval is a  
 478 corrected significance value

| Gene ID   | Description                                | <i>b</i> | <i>q-value</i> |
|-----------|--------------------------------------------|----------|----------------|
| SVEN_2281 | 3-oxoacyl-[acyl-carrier protein] reductase | 7.02     | 2.23E-67       |
| SVEN_3512 | Thermophilic serine proteinase precursor   | 6.25     | 6.09E-54       |

|           |                                                            |       |          |
|-----------|------------------------------------------------------------|-------|----------|
| SVEN_3511 | hypothetical protein                                       | 6.16  | 6.63E-78 |
| SVEN_6114 | Permease of the drug or metabolite transporter superfamily | 5.44  | 3.63E-71 |
| SVEN_3814 | hypothetical protein                                       | 5.42  | 3.85E-65 |
| SVEN_5314 | putative integral membrane protein                         | 5.09  | 1.69E-26 |
| SVEN_3510 | Transcriptional regulator, GntR family                     | 5.04  | 2.09E-70 |
| SVEN_4124 | aminoglycoside phosphotransferase                          | 4.890 | 4.92E-47 |
| SVEN_3509 | D-3-phosphoglycerate dehydrogenase                         | 4.47  | 1.69E-62 |
| SVEN_0042 | hypothetical protein                                       | 4.00  | 1.81E-22 |
| SVEN_4562 | RNA polymerase sigma-70 factor                             | 3.99  | 2.22E-28 |
| SVEN_4122 | secreted protein                                           | 3.61  | 1.32E-46 |

479

## 480 Bibliography

- 481 1. Feklístov A, Sharon BD, Darst SA, Gross CA. 2014. Bacterial sigma factors: a  
482 historical, structural, and genomic perspective. *Annu Rev Microbiol* 68:357–376.
- 483 2. Helmann JD. 2019. Where to begin? Sigma factors and the selectivity of  
484 transcription initiation in bacteria. *Mol Microbiol* 112:335–347.
- 485 3. Sineva E, Savkina M, Ades SE. 2017. Themes and variations in gene regulation  
486 by extracytoplasmic function (ECF) sigma factors. *Curr Opin Microbiol* 36:128–  
487 137.
- 488 4. Staroń A, Sofia HJ, Dietrich S, Ulrich LE, Liesegang H, Mascher T. 2009. The

- 489 third pillar of bacterial signal transduction: classification of the extracytoplasmic  
490 function (ECF) sigma factor protein family. *Mol Microbiol* 74:557–581.
- 491 5. Ho TD, Ellermeier CD. 2012. Extra cytoplasmic function  $\sigma$  factor activation. *Curr*  
492 *Opin Microbiol* 15:182–188.
- 493 6. Mascher T. 2013. Signaling diversity and evolution of extracytoplasmic function  
494 (ECF)  $\sigma$  factors. *Curr Opin Microbiol* 16:148–155.
- 495 7. Campbell EA, Tupy JL, Gruber TM, Wang S, Sharp MM, Gross CA, Darst SA.  
496 2003. Crystal structure of *Escherichia coli* sigmaE with the cytoplasmic domain of  
497 its anti-sigma RseA. *Mol Cell* 11:1067–1078.
- 498 8. Eberhardt RY, Chang Y, Bateman A, Murzin AG, Axelrod HL, Hwang WC,  
499 Aravind L. 2013. Filling out the structural map of the NTF2-like superfamily. *BMC*  
500 *Bioinformatics* 14:327.
- 501 9. Goutam K, Gupta AK, Gopal B. 2017. The fused SnoaL\_2 domain in the  
502 *Mycobacterium tuberculosis* sigma factor  $\sigma$ J modulates promoter recognition.  
503 *Nucleic Acids Res* 45:9760–9772.
- 504 10. Liu Q, Pinto D, Mascher T. 2018. Characterization of the Widely Distributed Novel  
505 ECF42 Group of Extracytoplasmic Function  $\sigma$  Factors in *Streptomyces*  
506 *venezuelae*. *J Bacteriol* 200.
- 507 11. Wu H, Liu Q, Casas-Pastor D, Dürr F, Mascher T, Fritz G. 2019. The role of C-  
508 terminal extensions in controlling ECF  $\sigma$  factor activity in the widely conserved  
509 groups ECF41 and ECF42. *Mol Microbiol* 112:498–514.
- 510 12. Wecke T, Halang P, Staroń A, Dufour YS, Donohue TJ, Mascher T. 2012.

- 511 Extracytoplasmic function  $\sigma$  factors of the widely distributed group ECF41 contain  
512 a fused regulatory domain. *Microbiologyopen* 1:194–213.
- 513 13. Huang X, Pinto D, Fritz G, Mascher T. 2015. Environmental sensing in  
514 actinobacteria: a comprehensive survey on the signaling capacity of this phylum.  
515 *J Bacteriol* 197:2517–2535.
- 516 14. Lee J-H, Geiman DE, Bishai WR. 2008. Role of stress response sigma factor  
517 SigG in *Mycobacterium tuberculosis*. *J Bacteriol* 190:1128–1133.
- 518 15. Gaudion A, Dawson L, Davis E, Smollett K. 2013. Characterisation of the  
519 *Mycobacterium tuberculosis* alternative sigma factor SigG: its operon and regulon.  
520 *Tuberculosis (Edinb)* 93:482–491.
- 521 16. Stringer AM, Currenti S, Bonocora RP, Baranowski C, Petrone BL, Palumbo MJ,  
522 Reilly AA, Zhang Z, Erill I, Wade JT. 2014. Genome-scale analyses of *Escherichia*  
523 *coli* and *Salmonella enterica* AraC reveal noncanonical targets and an expanded  
524 core regulon. *J Bacteriol* 196:660–671.
- 525 17. Pimentel H, Bray NL, Puente S, Melsted P, Pachter L. 2017. Differential analysis  
526 of RNA-seq incorporating quantification uncertainty. *Nat Methods* 14:687–690.
- 527 18. Lewin GR, Carlos C, Chevrette MG, Horn HA, McDonald BR, Stankey RJ, Fox  
528 BG, Currie CR. 2016. Evolution and ecology of actinobacteria and their bioenergy  
529 applications. *Annu Rev Microbiol* 70:235–254.
- 530 19. Pinto D, Liu Q, Mascher T. 2019. ECF  $\sigma$  factors with regulatory extensions: the  
531 one-component systems of the  $\sigma$  universe. *Mol Microbiol* 112:399–409.
- 532 20. Manganelli R, Dubnau E, Tyagi S, Kramer FR, Smith I. 1999. Differential

- 533 expression of 10 sigma factor genes in *Mycobacterium tuberculosis*. *Mol Microbiol*  
534 31:715–724.
- 535 21. Cappelli G, Volpe E, Grassi M, Liseo B, Colizzi V, Mariani F. 2006. Profiling of  
536 *Mycobacterium tuberculosis* gene expression during human macrophage  
537 infection: upregulation of the alternative sigma factor G, a group of transcriptional  
538 regulators, and proteins with unknown function. *Res Microbiol* 157:445–455.
- 539 22. Müller AU, Imkamp F, Weber-Ban E. 2018. The Mycobacterial LexA/RecA-  
540 Independent DNA Damage Response Is Controlled by PafBC and the Pup-  
541 Proteasome System. *Cell Rep* 23:3551–3564.
- 542 23. Rhodius VA, Segall-Shapiro TH, Sharon BD, Ghodasara A, Orlova E, Tabakh H,  
543 Burkhardt DH, Clancy K, Peterson TC, Gross CA, Voigt CA. 2013. Design of  
544 orthogonal genetic switches based on a crosstalk map of  $\sigma$ s, anti- $\sigma$ s, and  
545 promoters. *Mol Syst Biol* 9:702.
- 546 24. Zong Y, Zhang HM, Lyu C, Ji X, Hou J, Guo X, Ouyang Q, Lou C. 2017. Insulated  
547 transcriptional elements enable precise design of genetic circuits. *Nat Commun*  
548 8:52.
- 549 25. Bervoets I, Van Brempt M, Van Nerom K, Van Hove B, Maertens J, De Mey M,  
550 Charlier D. 2018. A sigma factor toolbox for orthogonal gene expression in  
551 *Escherichia coli*. *Nucleic Acids Res* 46:2133–2144.
- 552 26. Pinto D, Dürr F, Frieriep F, Araújo D, Liu Q, Mascher T. 2019. Extracytoplasmic  
553 Function  $\sigma$  Factors Can Be Implemented as Robust Heterologous Genetic  
554 Switches in *Bacillus subtilis*. *iScience* 13:380–390.

- 555 27. Pinto D, Vecchione S, Wu H, Mauri M, Mascher T, Fritz G. 2018. Engineering  
556 orthogonal synthetic timer circuits based on extracytoplasmic function  $\sigma$  factors.  
557 *Nucleic Acids Res* 46:7450–7464.
- 558 28. Shepherd MD, Kharel MK, Bosserman MA, Rohr J. 2010. Laboratory  
559 maintenance of *Streptomyces* species. *Curr Protoc Microbiol* Chapter 10:Unit  
560 10E.1.
- 561 29. Bierman M, Logan R, O'Brien K, Seno ET, Rao RN, Schoner BE. 1992. Plasmid  
562 cloning vectors for the conjugal transfer of DNA from *Escherichia coli* to  
563 *Streptomyces* spp. *Gene* 116:43–49.
- 564 30. Phelan RM, Sachs D, Petkiewicz SJ, Barajas JF, Blake-Hedges JM, Thompson  
565 MG, Reider Apel A, Rasor BJ, Katz L, Keasling JD. 2017. Development of Next  
566 Generation Synthetic Biology Tools for Use in *Streptomyces venezuelae*. *ACS*  
567 *Synth Biol* 6:159–166.
- 568 31. Lee TS, Krupa RA, Zhang F, Hajimorad M, Holtz WJ, Prasad N, Lee SK, Keasling  
569 JD. 2011. BglBrick vectors and datasheets: A synthetic biology platform for gene  
570 expression. *J Biol Eng* 5:12.
- 571 32. Ham TS, Dmytriv Z, Plahar H, Chen J, Hillson NJ, Keasling JD. 2012. Design,  
572 implementation and practice of JBEI-ICE: an open source biological part registry  
573 platform and tools. *Nucleic Acids Res* 40:e141.
- 574 33. Chen J, Densmore D, Ham TS, Keasling JD, Hillson NJ. 2012. DeviceEditor  
575 visual biological CAD canvas. *J Biol Eng* 6:1.
- 576 34. Hillson NJ, Rosengarten RD, Keasling JD. 2012. j5 DNA assembly design

- 577 automation software. *ACS Synth Biol* 1:14–21.
- 578 35. Gibson DG, Young L, Chuang R-Y, Venter JC, Hutchison CA, Smith HO. 2009.  
579 Enzymatic assembly of DNA molecules up to several hundred kilobases. *Nat*  
580 *Methods* 6:343–345.
- 581 36. Engler C, Kandzia R, Marillonnet S. 2008. A one pot, one step, precision cloning  
582 method with high throughput capability. *PLoS ONE* 3:e3647.
- 583 37. Bray NL, Pimentel H, Melsted P, Pachter L. 2016. Near-optimal probabilistic RNA-  
584 seq quantification. *Nat Biotechnol* 34:525–527.
- 585 38. Langmead B, Salzberg SL. 2012. Fast gapped-read alignment with Bowtie 2. *Nat*  
586 *Methods* 9:357–359.
- 587 39. Robinson JT, Thorvaldsdóttir H, Winckler W, Guttman M, Lander ES, Getz G,  
588 Mesirov JP. 2011. Integrative genomics viewer. *Nat Biotechnol* 29:24–26.
- 589 40. Thompson MG, Pearson AN, Barajas JF, Cruz-Morales P, Sedaghatian N,  
590 Costello Z, Garber ME, Incha MR, Valencia LE, Baidoo EEK, Martin HG,  
591 Mukhopadhyay A, Keasling JD. 2020. Identification, Characterization, and  
592 Application of a Highly Sensitive Lactam Biosensor from *Pseudomonas putida*.  
593 *ACS Synth Biol* 9:53–62.
- 594 41. Finn RD, Clements J, Eddy SR. 2011. HMMER web server: interactive sequence  
595 similarity searching. *Nucleic Acids Res* 39:W29-37.
- 596 42. Katoh K, Standley DM. 2013. MAFFT multiple sequence alignment software  
597 version 7: improvements in performance and usability. *Mol Biol Evol* 30:772–780.
- 598 43. Okonechnikov K, Golosova O, Fursov M, UGENE team. 2012. Unipro UGENE: a



- 599 unified bioinformatics toolkit. *Bioinformatics* 28:1166–1167.
- 600 44. Bakan A, Meireles LM, Bahar I. 2011. ProDy: protein dynamics inferred from  
601 theory and experiments. *Bioinformatics* 27:1575–1577.
- 602 45. Bakan A, Dutta A, Mao W, Liu Y, Chennubhotla C, Lezon TR, Bahar I. 2014. Evol  
603 and ProDy for bridging protein sequence evolution and structural dynamics.  
604 *Bioinformatics* 30:2681–2683.
- 605 46. Crooks GE, Hon G, Chandonia JM, Brenner SE. 2004. WebLogo: a sequence  
606 logo generator. *Genome Res* 14:1188–1190.
- 607 47. Edgar RC. 2004. MUSCLE: multiple sequence alignment with high accuracy and  
608 high throughput. *Nucleic Acids Res* 32:1792–1797.
- 609 48. Waterhouse AM, Procter JB, Martin DMA, Clamp M, Barton GJ. 2009. Jalview  
610 Version 2--a multiple sequence alignment editor and analysis workbench.  
611 *Bioinformatics* 25:1189–1191.
- 612 49. Nguyen L-T, Schmidt HA, von Haeseler A, Minh BQ. 2015. IQ-TREE: a fast and  
613 effective stochastic algorithm for estimating maximum-likelihood phylogenies. *Mol*  
614 *Biol Evol* 32:268–274.
- 615 50. Navarro-Muñoz JC, Selem-Mojica N, MULLOWNEY MW, KAUTSAR SA, TRYON JH,  
616 PARKINSON EI, DE LOS SANTOS ELC, YEONG M, CRUZ-MORALES P, ABUBUCKER S,  
617 ROETERS A, LOKHORST W, FERNANDEZ-GUERRA A, CAPPELINI LTD, GOERING AW,  
618 THOMSON RJ, METCALF WW, KELLEHER NL, BARONA-GOMEZ F, MEDEMA MH. 2020. A  
619 computational framework to explore large-scale biosynthetic diversity. *Nat Chem*  
620 *Biol* 16:60–68.

621 51. Potter SC, Luciani A, Eddy SR, Park Y, Lopez R, Finn RD. 2018. HMMER web  
622 server: 2018 update. *Nucleic Acids Res* 46:W200–W204.
